# Supplementary material
Source: HighWire-hosted journal article supplement (doi:10.1101/rna.080002.124)
Supplement: Supplemental_Material.docx [file Supplemental_Material.docx]

**Supplementary Data**

**Supplementary Table 1. DNA sequences**

| **Name** | **Sequence** |
| --- | --- |
| **DNA1_F** | **TGAGTGGAACGGCAAGGGAG** |
| **IRES-Cas_F** | **CTTCGGTTTCTTTTAATCTTTTCGG** |
| **DNA1** | TAGAGTACACGAGTCAGGCTACAGCATCCTCTGGTTCAGACTACTTGATTCATGTGTACCCTATATGCGAGGATATGTGTATCGTAGAAATTGTCAG  GCAGTAACGTTCCGCGAGTTTTAATGGGCGCGCCATGACTCTAAGAGTGATATACCTCCTCGGTCTCGGGCCCGGGGTGTAATTAGCCCAGTTAGAC  ACGATCGCCCGACGTATATTGTTGCTTGGGTATCGTCGCATGCGAAGTATTGCCCAAGGAGACACAACAAGCAACTTATGTTGACTCCCTTCGACCA  TTAAAATTTGTTAGAACGGACAGAAAGGATGCGCCTTATAAATGTCCTGTGCAGTGATGAAGCGACCTCAAAACGCTTCATGATCTAACCGACTCA  CCTTGCCGTTCCCTCCGCGCCTTAAAACCGGCCGGTCTTGCGAAAAGCGGGAAACGAGTTTACCCACGGATAGCAGGGAATGTTGCGGCTGGCTAG  GGAGCATGAAGGTAGATACTCCACGGCTTACCTTTCCGGGGCTCAACATCTAGCCACAGACCTTTTCGTTAAGCCCACCCCCACTGGATACTGAATC  ATCAGGGAACCGGACCCAACCAGTTTGGGCTCGTCCAAGCTTCGGTCTCGTCCCTAAGTGCAAAGATATGGAAAGAGCAGCATAGGTATATGGATT  ATTCTTTTACCACTCGTTTCTTACCGTAACTTACGCAATGGATCACGTGCCGAGGCGGCGGTACAGCTGTTCGAAGGGCTCTGTCGGGAACGCTAAC  ATCCAGCCGGTAAATTCCAAACTAGGGAAAGGACACGCACTGAATTGAATATAGTCGTGAAGGGTGGTGTAAGTCGTGCACAGCCCGCATTAAGTA  CTAAACAGCGTCCAATCTTGATCTACTTACGGCCTGATGTTCTTCAGCACCTCCTAGCACTGGAGTACTTCGCTATCAATGAGATTAGCACTTTGTAC  ATGTCATCCAGCCCGAGTCTGGGGTCCGACAATGCGGTCGCCGATTGGTATCTGCATGTAGTATTAAACGGAGCTGCCGCGGCTGCGGATTATAGTT  CATGTCTTGACGGTCCTCGTGAACTGT |
| **IRES-Cas** | CCCCTCTCCCTCCCCCCCTAACGTTACTGGCCGAAGCCGCTTGGAATAAGGCCGGTGTGCGTTTGTCTATATGTTATTTTCCACCATATTGCCGTCTTTTG  GCAATGTGAGGGCCCGGAAACCTGGCCCTGTCTTCTTGACGAGCATTCCTAGGGGTCTTTCCCCTCTCGCCAAAGGAATGCAAGGTCTGTTGAATGTC  GTGAAGGAAGCAGTTCCTCTGGAAGCTTCTTGAAGACAAACAACGTCTGTAGCGACCCTTTGCAGGCAGCGGAACCCCCCACCTGGCGACAGGTGC  CTCTGCGGCCAAAAGCCACGTGTATAAGATACACCTGCAAAGGCGGCACAACCCCAGTGCCACGTTGTGAGTTGGATAGTTGTGGAAAGAGTCAAAT  GGCTCTCCTCAAGCGTATTCAACAAGGGGCTGAAGGATGCCCAGAAGGTACCCCATTGTATGGGATCTGATCTGGGGCCTCGGTGCACATGCTTTACAT  GTGTTTAGTCGAGGTTAAAAAACGTCTAGGCCCCCCGAACCACGGGGACGTGGTTTTCCTTTGAAAAACACGATGATAATATGGGCGAAAGCGTGAAA  GCAATTAAGCTGAAGATCCTGGATATGTTTCTGGACCCCGAGTGCACGAAGCAGGATGATAACTGGCGCAAAGATTTGTCTACTATGTCCAGATTCTGC  GCTGAGGCCGGGAATATGTGCCTGCGGGACCTGTATAATTACTTTAGCATGCCCAAGGAAGATCGGATTTCCAGCAAAGACTTATACAACGCCATGTATC  ATAAAACTAAACTTCTCCACCCAGAGCTGCCAGGTAAGGTCGCGAATCAAATCGTGAACCACGCTAAGGATGTTTGGAAACGCAACGCTAAACTCATTT  ATCGGAATCAAATCTCAATGCCTACTTATAAGATCACAACCGCCCCAATCCGGCTGCAGAATAACATTTATAAGTTAATCAAGAATAAGAACAAGTACATC  ATAGACGTGCAGCTGTACTCCAAGGAATACTCCAAGGATAGTGGTAAGGGCACTCATAGGTATTTCCTGGTCGCCGTTAGAGACTCATCTACCCGGATGAT  ATTCGATAGGATTATGAGTAAGGACCATATTGACAGTTCTAAGTCATACACGCAGGGACAGCTCCAGATCAAGAAAGACCACCAGGGGAAGTGGTATTGC  ATCATCCCCTATACTTTCCCTACACATGAGACAGTCCTCGACCCGGATAAAGTCATGGGAGTCGACCTTGGCGTGGCCAAAGCTGTGTACTGGGCGTTCAA  TAGCTCTTACAAAAGAGGCTGTATCGATGGAGGGGAGATCGAGCATTTCCGCAAAATGATACGAGCACGAAGAGTGAGCATCCAAAATCAGATCAAGCA  CTCAGGAGACGCCCGTAAAGGACATGGGCGCAAAAGGGCCCTAAAACCCATAGAAACATTGAGCGAGAAGGAGAAGAATTTTAGGGATACCATAAACCA  CAGATATGCAAATCGAATTGTAGAAGCCGCTATTAAGCAGGGCTGTGGGACGATCCAGATCGAGAACCTTGAGGGTATAGCTGACACCACAGGCAGTAAA  TTTCTCAAGAACTGGCCTTACTACGACCTGCAGACAAAGATTGTGAATAAAGCCAAGGAACACGGCATTACCGTGGTTGCAATCAACCCCCAATATACATC  CCAAAGGTGCTCGATGTGCGGGTATATTGAAAAAACCAACCGTTCTAGCCAGGCAGTGTTTGAGTGTAAGCAGTGCGGTTACGGCAGTCGGACTATATGTA  TTAACTGCAGGCACGTCCAAGTATCCGGGGATGTTTGTGAGGAATGTGGCGGCATCGTAAAAAAAGAAAACGTGAACGCAGACTACAATGCGGCCAAGAA  CATTTCCACCCCGTACATCGACCAGATAATCATGGAGAAGTGTCTGGAACTAGGGATTCCTTACCGCAGCATCACCTGTAAGGAATGTGGTCACATCCAGGC  TTCAGGAAATACCTGCGAGGTGTGCGGATCTACTAATATTTTGAAGCCAAAGAAAATTAGAAAAGCCAAA |

**Supplementary Table 2. Pairwise error rates (×10-6) for polymerase and amplicon combinations**

| **Amplicon** | **RNAP** | **RT** | **RNAP**  **substitution** | **RNAP deletion** | **RNAP insertion** | **RNAP**  **Total** | **RT substitution** | **RT deletion** | **RT insertion** | **RT**  **Total** |
| --- | --- | --- | --- | --- | --- | --- | --- | --- | --- | --- |
| **DNA1** | T7 | Induro | 38 ± 7 | 2 ± 0 | 13 ± 0 | 53 ± 7 | 57 ± 2 | 7 ± 0 | 49 ± 1 | 113 ± 1 |
|  | T7 | LINE-1 | 36 ± 2 | 2 ± 0 | 12 ± 0 | 50 ± 2 | 220 ± 4 | 9 ± 0 | 49 ± 2 | 278 ± 6 |
|  | T7 | FBu | 39 ± 5 | 2 ± 0 | 13 ± 1 | 54 ± 5 | 130 ± 75 | 7 ± 1 | 52 ± 15 | 189 ± 69 |
| **IRES-Cas** | T7 | Induro | 60 ± 9 | 15 ± 3 | 51 ± 3 | 125 ± 11 | 63 ± 7 | 7 ± 2 | 126 ± 9 | 196 ± 14 |

**Supplementary Table 3.** Number of substitutions, deletions, and insertions detected in Roll-Seq concatemers

| **RNA polymerase** | **RT** | **Amplicon** | **SNP** |  |  |  | **DEL** |  |  |  | **INS** |  |  |  |
| --- | --- | --- | --- | --- | --- | --- | --- | --- | --- | --- | --- | --- | --- | --- |
|  |  |  | **Total1** | **"One"2** | **"All"3** | **Other4** | **Total1** | **"One"2** | **"All"3** | **Other4** | **Total1** | **"One"2** | **"All"3** | **Other4** |
| T7 RNA polymerase | Induro RT | DNA1 | 80,369 | 66,558 | 13,271 | 540 | 9,220 | 8,408 | 755 | 57 | 62,383 | 57,463 | 4,749 | 171 |
| T7 RNA polymerase | L1-RT | DNA1 | 211,564 | 199,840 | 9,732 | 1,992 | 9,191 | 8,567 | 520 | 104 | 47,712 | 44,142 | 3,210 | 360 |
| T7 RNA polymerase | R2-RT | DNA1 | 171,669 | 156,740 | 13,239 | 1,690 | 9,385 | 8,454 | 788 | 143 | 66,758 | 62,025 | 4,395 | 338 |
| T7 RNA polymerase | Induro RT | IRES-Cas | 6,474 | 4,893 | 1,517 | 64 | 921 | 525 | 374 | 22 | 11,763 | 9,739 | 1,291 | 733 |

1 Total is the total number of detected mutations.

2 “One” is the number of mutations present in one concatemer only (RT errors).

3 “All” is the number of mutations present in all concatemers (RNAP errors).

4 Other is the number of mutations present in more than one but not all concatemers (ambiguous errors).

**Supplementary Table 4.** Frequency of ambiguous mutations in Roll-Seq

| **RNA polymerase** | **RT** | **Amplicon** | **SNP** |  | **DEL** |  | **INS** |  |
| --- | --- | --- | --- | --- | --- | --- | --- | --- |
|  |  |  | **rel. Total1** | **rel. "All"2** | **rel. Total1** | **rel. "All"2** | **rel. Total1** | **rel. "All"2** |
| T7 RNA polymerase | Induro RT | DNA1 | 0.7% | 4.1% | 0.6% | 7.5% | 0.3% | 3.6% |
| T7 RNA polymerase | L1-RT | DNA1 | 0.9% | 20.5% | 1.1% | 20.0% | 0.8% | 11.2% |
| T7 RNA polymerase | R2-RT | DNA1 | 1.0% | 12.8% | 1.5% | 18.1% | 0.5% | 7.7% |
| T7 RNA polymerase | Induro RT | IRES-Cas | 1.0% | 4.2% | 2.4% | 5.9% | 6.2% | 56.8% |

1 Frequency of ambiguous mutations relative to the total number of detected mutations.

2 Frequency of ambiguous mutations relative to “All” mutations.

**
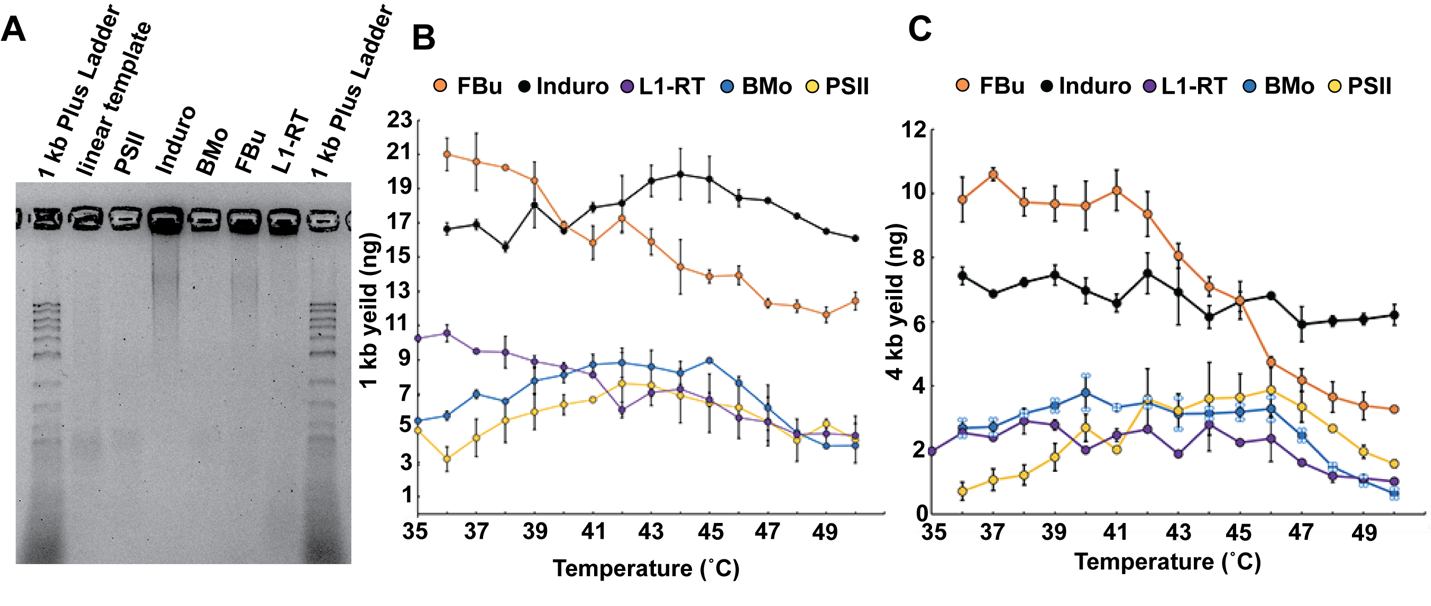
**

**Supplementary Figure 1.** cDNA synthesis by reverse transcriptases. (A) rolling circle reverse transcription of 1.2 kb circular RNA template. Products are analyzed by 1.2% 1xTBE agarose gel. (B) Temperature dependence of cDNA synthesis yield of a 1 kb linear RNA measured by TapeStation. Temperature dependence of cDNA synthesis yield of a 4 kb linear RNA.


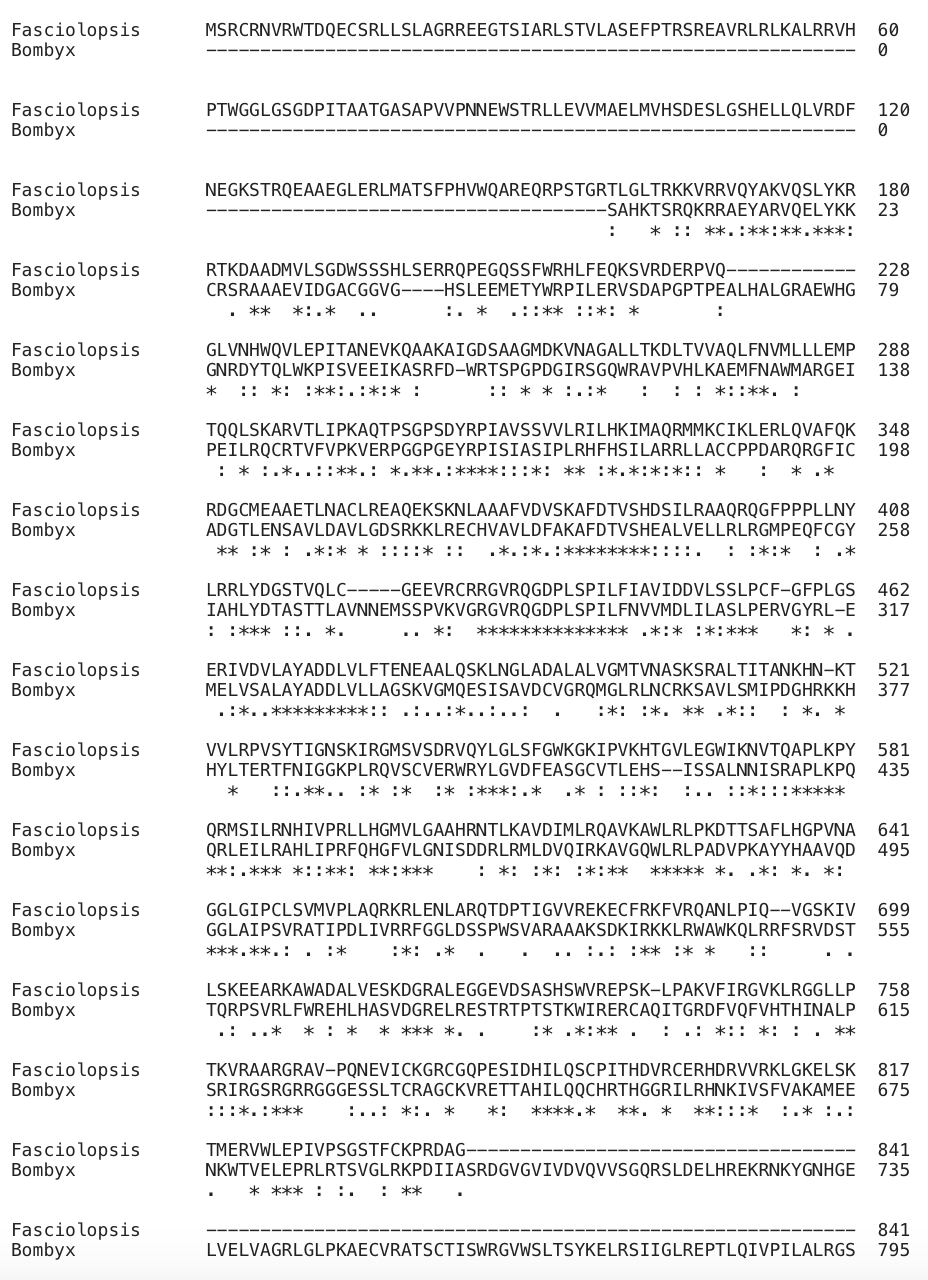


**Supplementary Figure 2.** Sequence alignment of FBu and BMo by ClustalOmega. FBu shares 31% sequence identity to BMo.

**
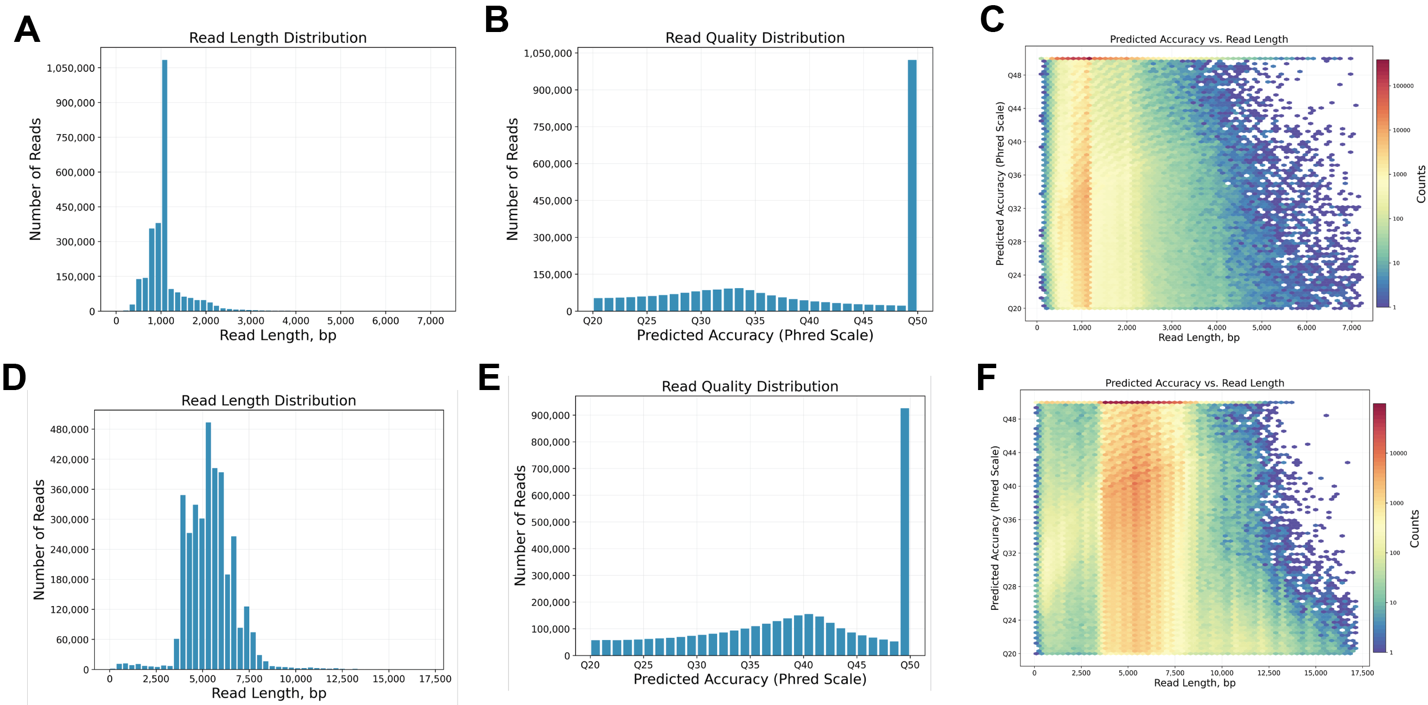
**

**Supplementary Figure 3**. Pacific Biosciences SMRT Sequel II run quality data. (A-C) Linear sequencing. (D-F) Roll-Seq.

**
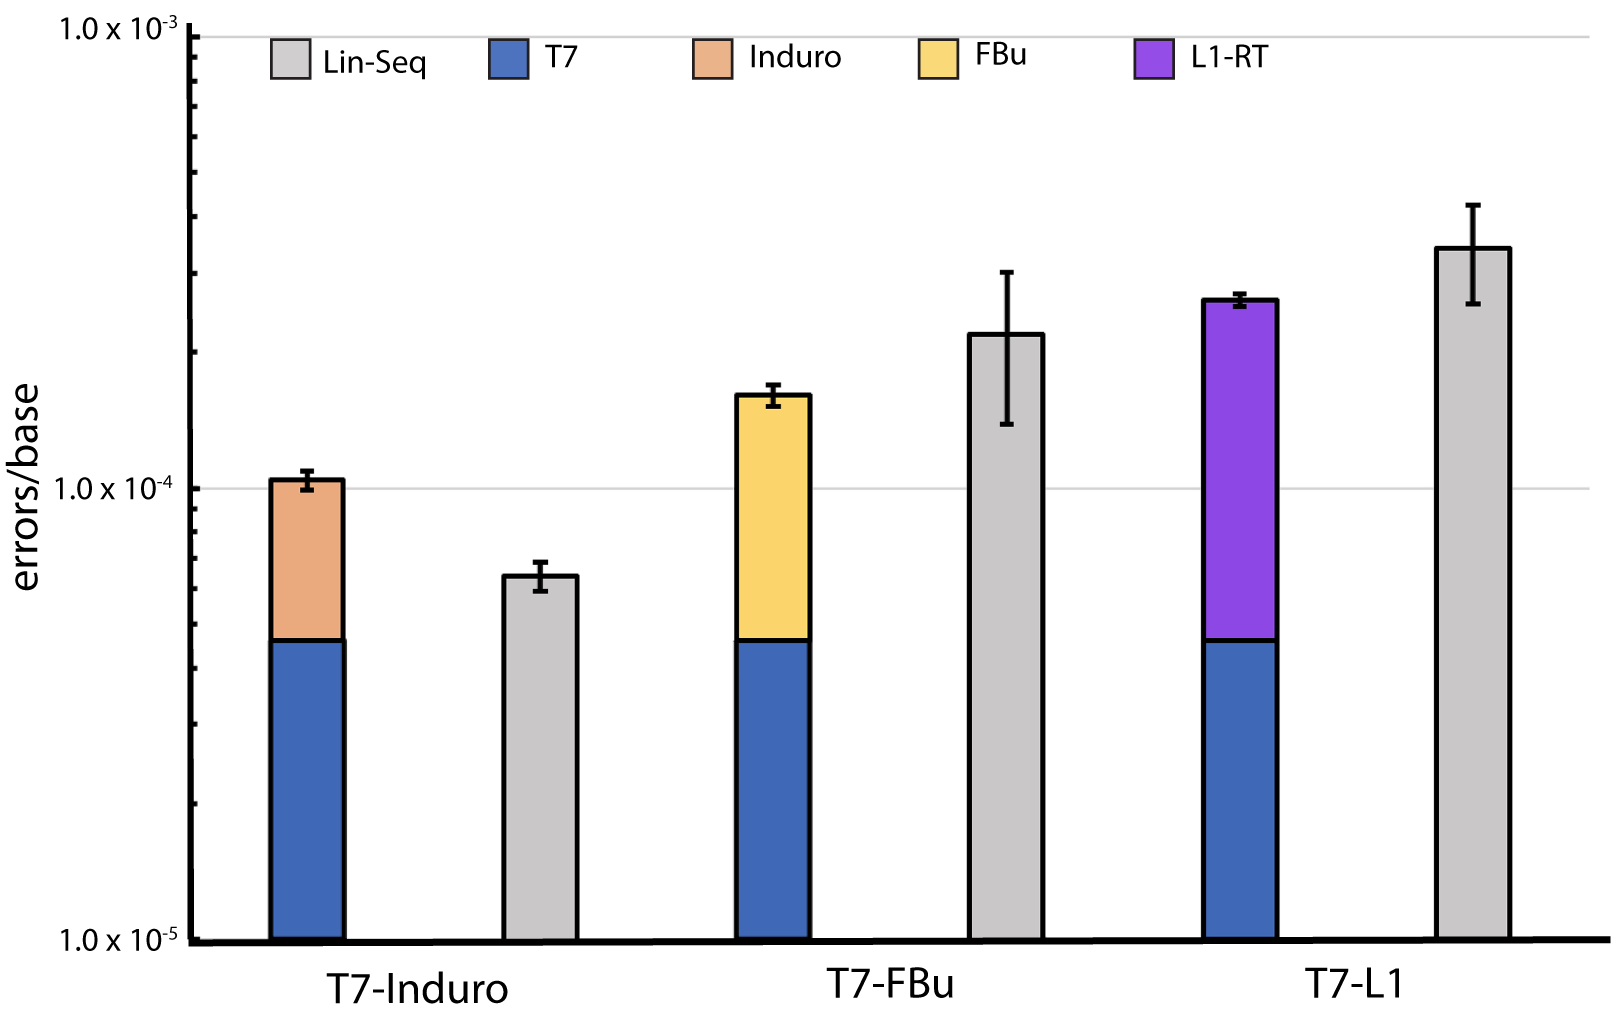
**

**Supplementary Figure 4.** Differences in error rate between Roll-Seq (color) and linear sequencing (grey).

**
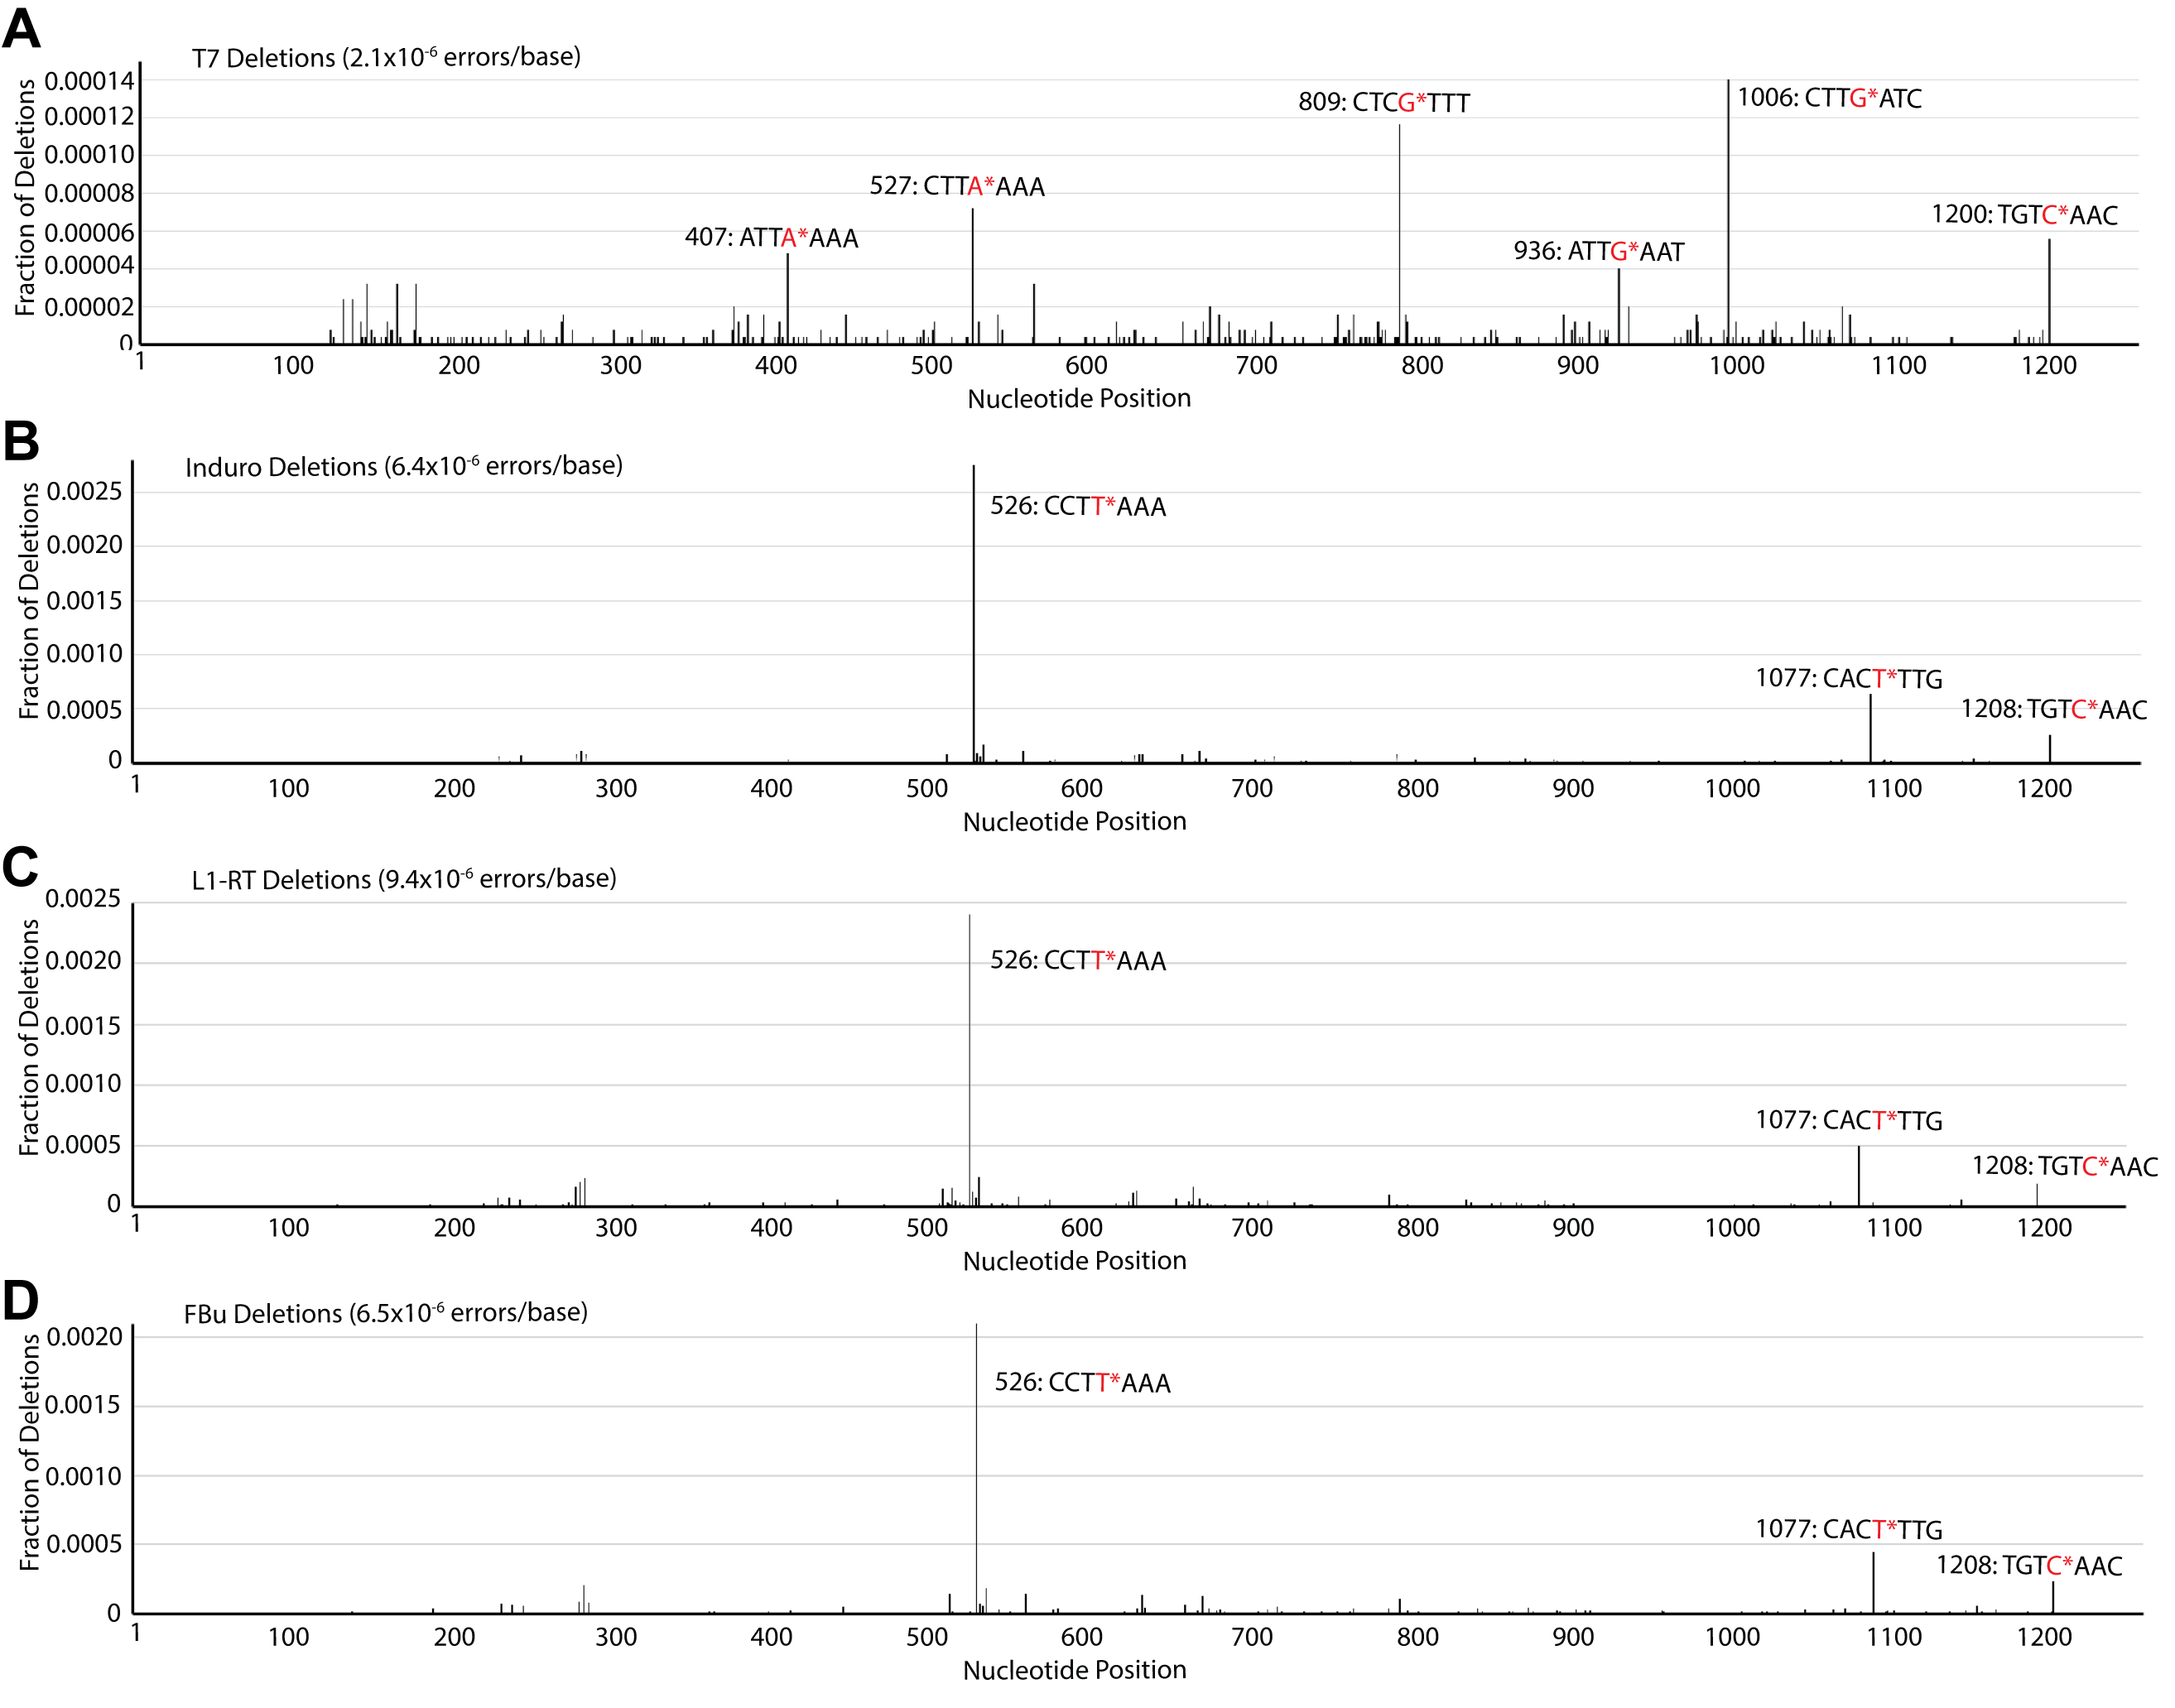
**

**Supplementary Figure 5.** Fraction of deletion mutations at each nucleotide position on template DNA1 for (A) T7, (B) Induro, (C) L1-RT, and (D) FBu. Most prevalent deletions are labeled red with asterisks with three adjacent nucleotides shown in black.

**
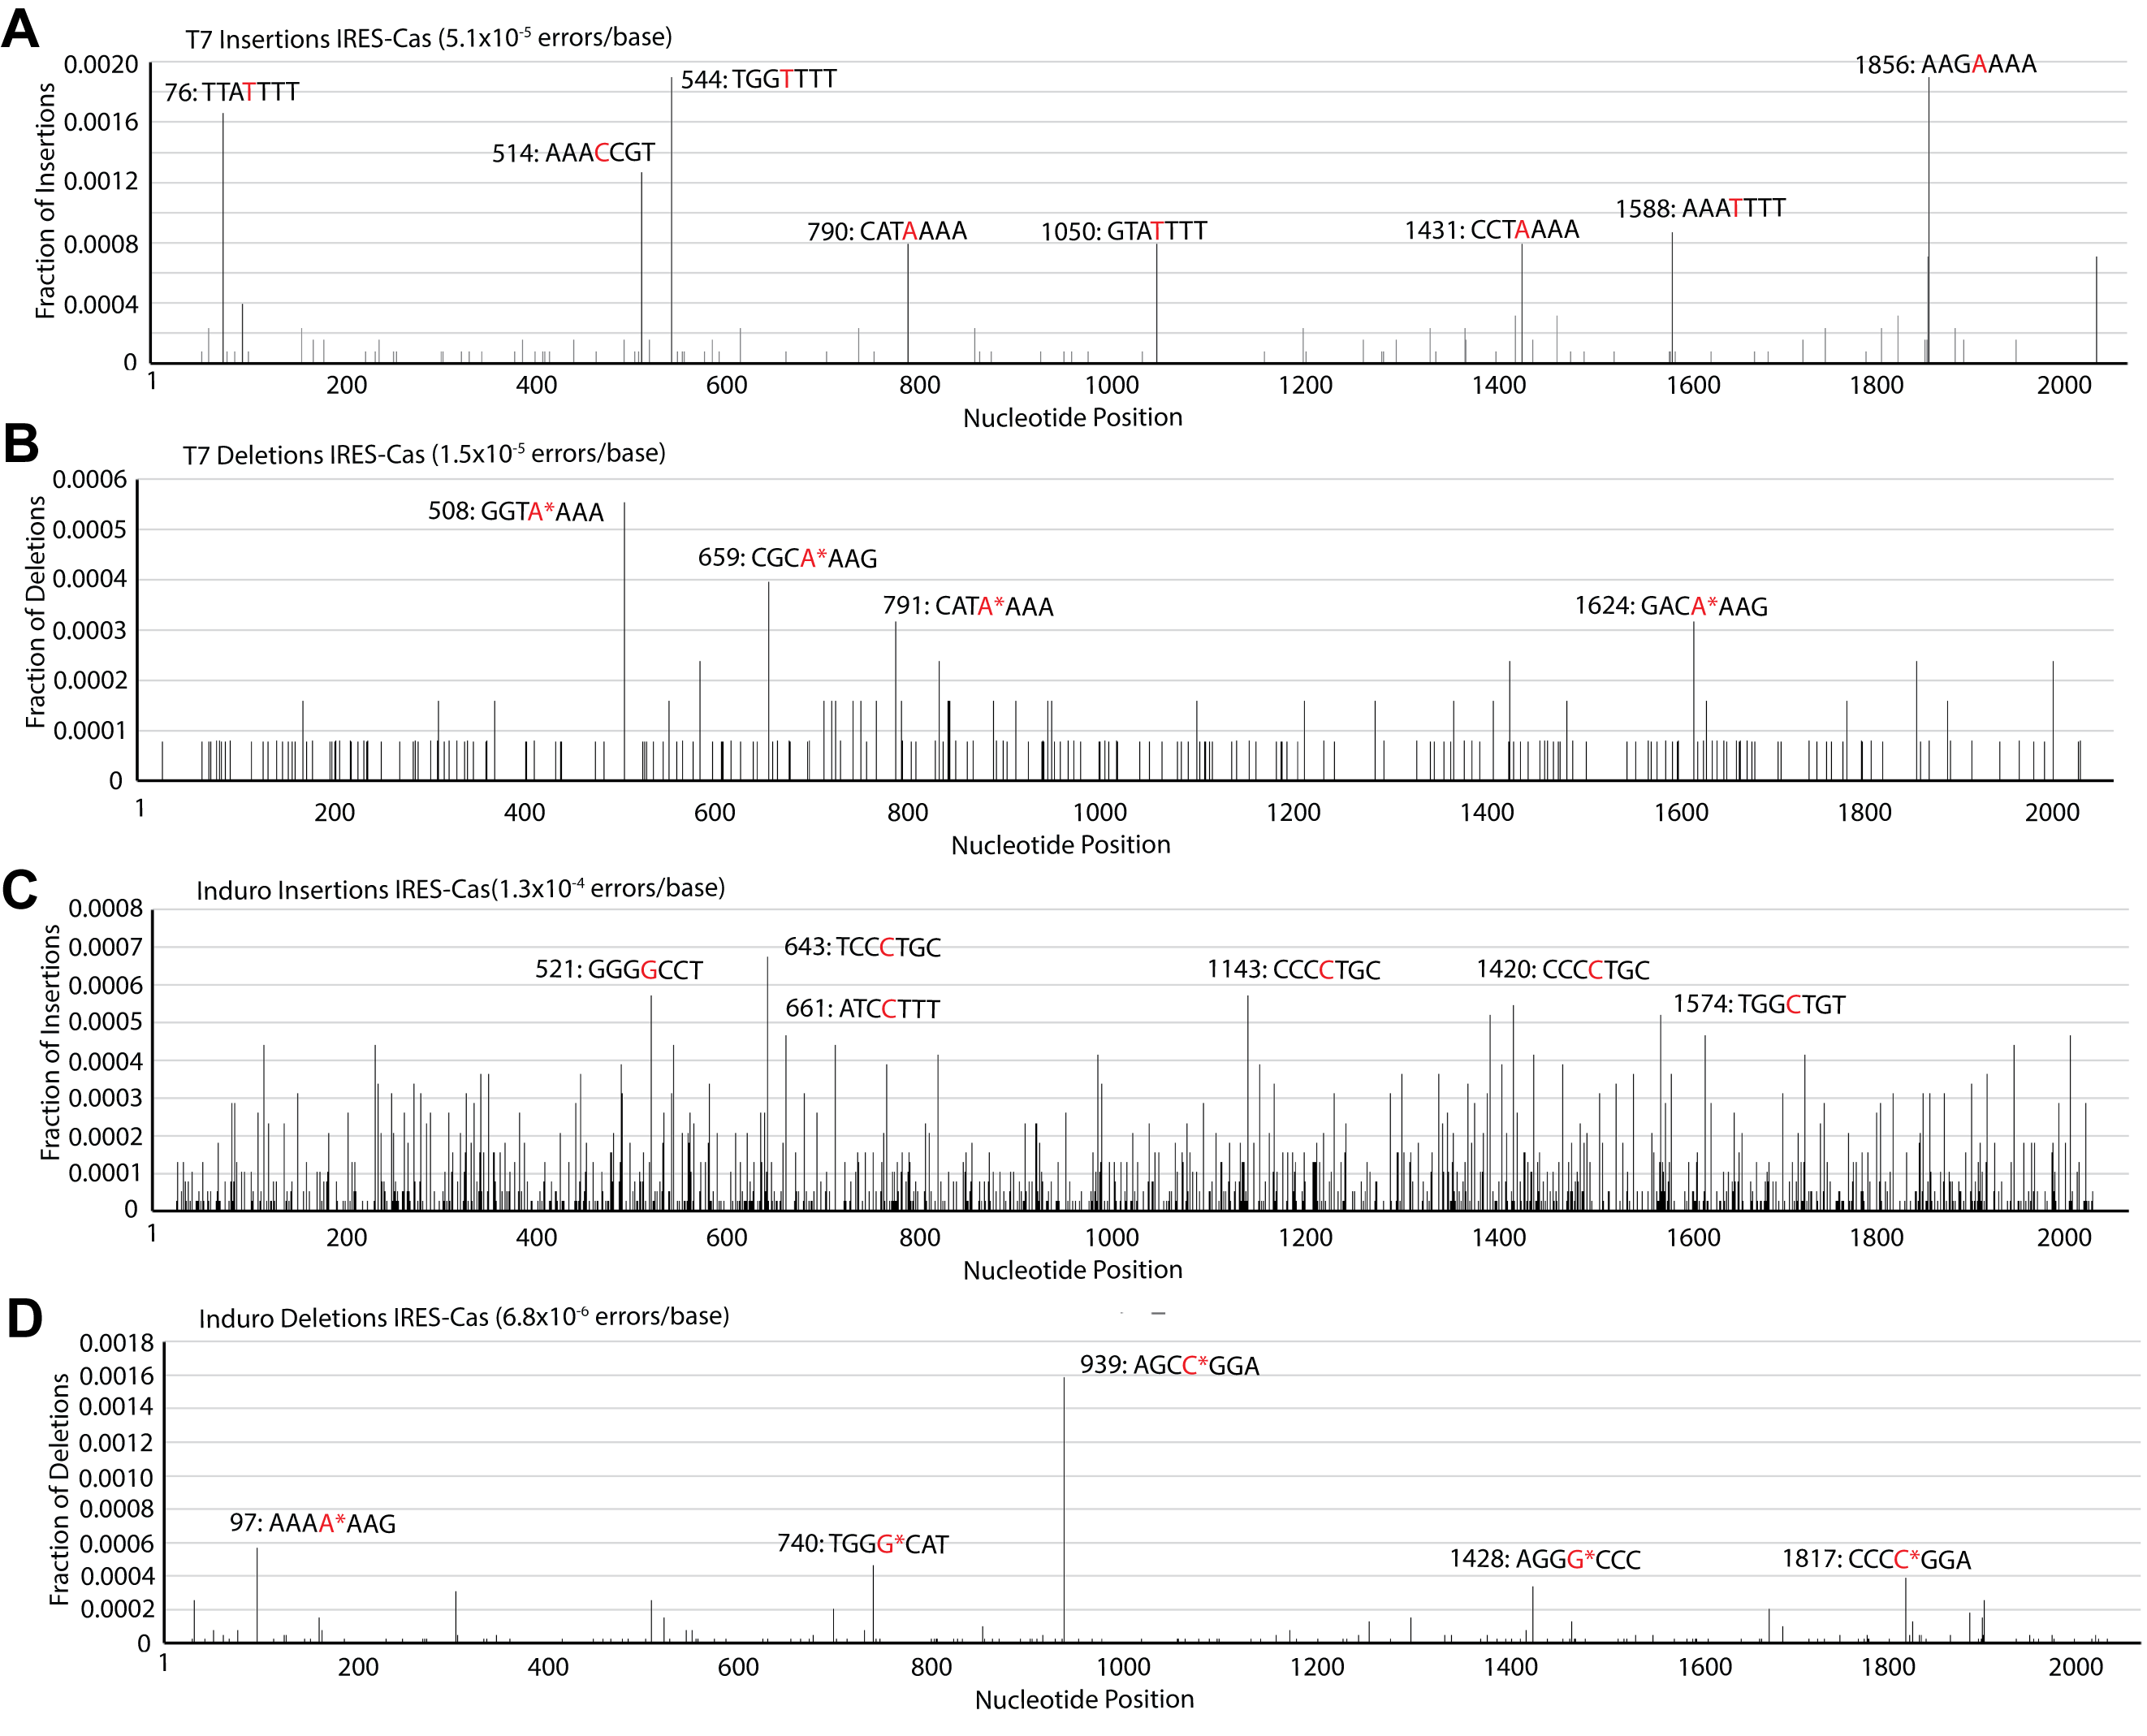
**

**Supplementary Figure 6.** Fraction of insertion and deletion mutations at each nucleotide position on template IRES-Cas.
